## Genome-Scale Metabolic Model Accurately Predicts Fermentation of Glucose by *Chromochloris zofingiensis*

Authors: Michelle Meagher<sup>†</sup>, Alex Metcalf<sup>†</sup>, S. Alex Ramsey, Walter Prentice, Nanette R. Boyle

<sup>†</sup>Denotes equal first authorship

Chemical and Biological Engineering Department, Colorado School of Mines, Golden, CO

Keywords: flux balance analysis, algae, astaxanthin

Abstract:

Algae have the potential to be sources of renewable fuels and chemicals. One particular strain, *Chromochloris zofingiensis*, is of interest due to the co-production of triacylglycerols (TAGs) and astaxanthin, a valuable nutraceutical. To aid in future engineering efforts, we have developed the first genome-scale metabolic model on *C. zofingiensis*, iChr1925. This model includes 1925 genes, 3481 metabolic reactions and 2778 metabolites. The model was used to predict flux distributions for three different growth conditions: autotrophic, mixotrophic and heterotrophic growth. The model predicted production of fermentation products for growth on glucose due to overflow metabolism and we confirmed this via metabolomics analysis of the spent medium. The metabolic network robustness of *Chromochloris zofingiensis* was also evaluated by conducting an *in silico* gene essentiality analysis. This work lays a foundation for future endeavors in the metabolic engineering of this unique organism.

## Introduction

Microalgae have the potential to serve as cellular factories, converting sunlight and carbon dioxide into a variety of valuable chemicals including lipids and fatty acids for fuel production. Rewiring metabolism for the overproduction of lipids or other metabolites is a difficult task which typically requires several changes in gene expression. Editing metabolic pathways while avoiding deleterious effects on the health of the cell requires extensive knowledge of the metabolic reaction network; specifically, how it functions and how it is regulated. One tool that can provide this critical information is a stoichiometric model of cellular metabolism. These models are relatively easy to generate and use and provide valuable insight into the metabolic network of a cell. Starting with a genome sequence, automated network annotation programs (Overbeek et al., 2004; Overbeek et al., 2014; Metcalf et al., 2020) can be used to create a high quality first draft model which enumerates all the metabolic reactions in the cell. After manual curation, the model can then be used to predict intracellular carbon flux distributions. Genome-scale metabolic models (GSMs) have been used successfully in a number of engineering efforts to design gene editing strategies in algae (Hirokawa et al., 2017) and bacteria (Puchalka et al., 2008; Rodriguez-Prados et al., 2009; Chua et al., 2015; Chen and Henson, 2016; Thompson et al., 2016; Wang et al., 2017; Emenike et al., 2018). Therefore, the logical first step in utilizing microalgae as cell factories is to develop the computational models necessary to interrogate metabolism and model the impact of genetic changes.

*Chromochloris zofingiensis* has a fully sequenced genome (Roth et al., 2017) and has been identified as a lead candidate for the production of lipids for fuel production (Breuer et al., 2012). *C. zofingiensis* has been reported to accumulate up to 40% of its cell dry weight as

triacylglycerols (TAGs) (Breuer et al., 2012) and it can also accumulate high levels of astaxanthin (Orosa et al., 2000; Liu et al., 2014), a naturally occurring pigment with powerful antioxidant properties. Due to its stereospecificity and antioxidant capabilities, naturally produced astaxanthin is a high-value nutraceutical with an estimated value of \$7,000/kg (Paniagua-Michel, 2015). The co-production of TAGs and a high-value product like astaxanthin make the economic feasibility of biofuels production from algae much more attainable. Numerous studies have explored growth conditions to maximize the production of lipids and astaxanthin in the cell. Stress conditions have been shown to increase expression of astaxanthin biosynthesis related genes in *C. zoofingiensis* (Li Y, 2009) and indeed growth in stress conditions (high light, nitrogen deprivation, high salinity) results in elevated levels of astaxanthin (Orosa et al., 2001; Liu et al., 2016; Chen et al., 2017; Sun et al., 2020). Stress conditions have also been associated with higher lipid content (Liu et al., 2016), but this comes at the cost of a lower biomass productivity (Mulders et al., 2014). *C. zoofingiensis* is capable of growing heterotrophically on various sugars, and heterotrophic growth is also associated with elevated levels of astaxanthin in the cell (Ip et al., 2004; Sun et al., 2008; Liu et al., 2011). Recent studies have shed light on the metabolic activities of *C. zoofingiensis* when grown on glucose, by analyzing both the transcriptome response and physical changes to the cell that occur when glucose is introduced. It was found that *C. zoofingiensis* is capable of a unique and reversible metabolic shift from autotrophic to purely heterotrophic growth when provided glucose (Roth et al., 2019). This trophic switch is characterized by the downregulation of chlorophyll production, loss of photosynthetic machinery and alterations in the thylakoid membrane structure, accompanied by the accumulation of energy storage compounds such as lipids and starch (Roth et al., 2019). The downregulation of chlorophyll synthesis leads to a decreased concentration of

primary photosynthetic pigments within the cell, even when grown under continuous illumination. Unlike nitrogen deprivation induced accumulation of lipids and astaxanthin, which suffers from decreased biomass productivity (Mulders et al., 2014), this reversible glucose initiated trophic switch results in an increase in biomass productivity (Roth et al., 2019). In this work, we present the first genome-scale model of *C. zofingiensis*, and its use to predict growth and carbon flux distributions in three different growth conditions: autotrophic, heterotrophic and mixotrophic. We have performed a detailed biochemical analysis of cellular biomass composition for each of these growth conditions to formulate accurate biomass formation equations. The results from these simulations predicted the formation of fermentation products in cultures grown on glucose, a previously uncharacterized behavior in this alga that has since been confirmed through two different methods of analysis.

## Results

### Network Reconstruction and Curation

The initial model draft was constructed using RAPS , an automated algorithm for building high quality genome scale metabolic models of new algal species. In this case, the donor models used to construct the model of *C. zofingiensis* were *Chlamydomonas reinhardtii* (Imam et al., 2015) and *Nannochloropsis gaditana* (Shah et al., 2017). The final curated model, iChr1925, includes 1925 genes, and 3481 reactions (2969 metabolic reactions and 512 transport reactions). Figure 1 summarizes model details, including reactions shared with donor models and compartmentalization of reactions and metabolites. Full lists of metabolites and reactions included in the model are included as supplemental files 2 and 3, respectively. The draft model created by RAPS was manually curated to ensure accuracy. Tables S1 and S2 in the

Supplemental Information (SI) provide a list of reactions that were manually added or removed from the RAPS output model during manual curation. Most notably, astaxanthin synthesis was added manually as neither donor model included these steps.

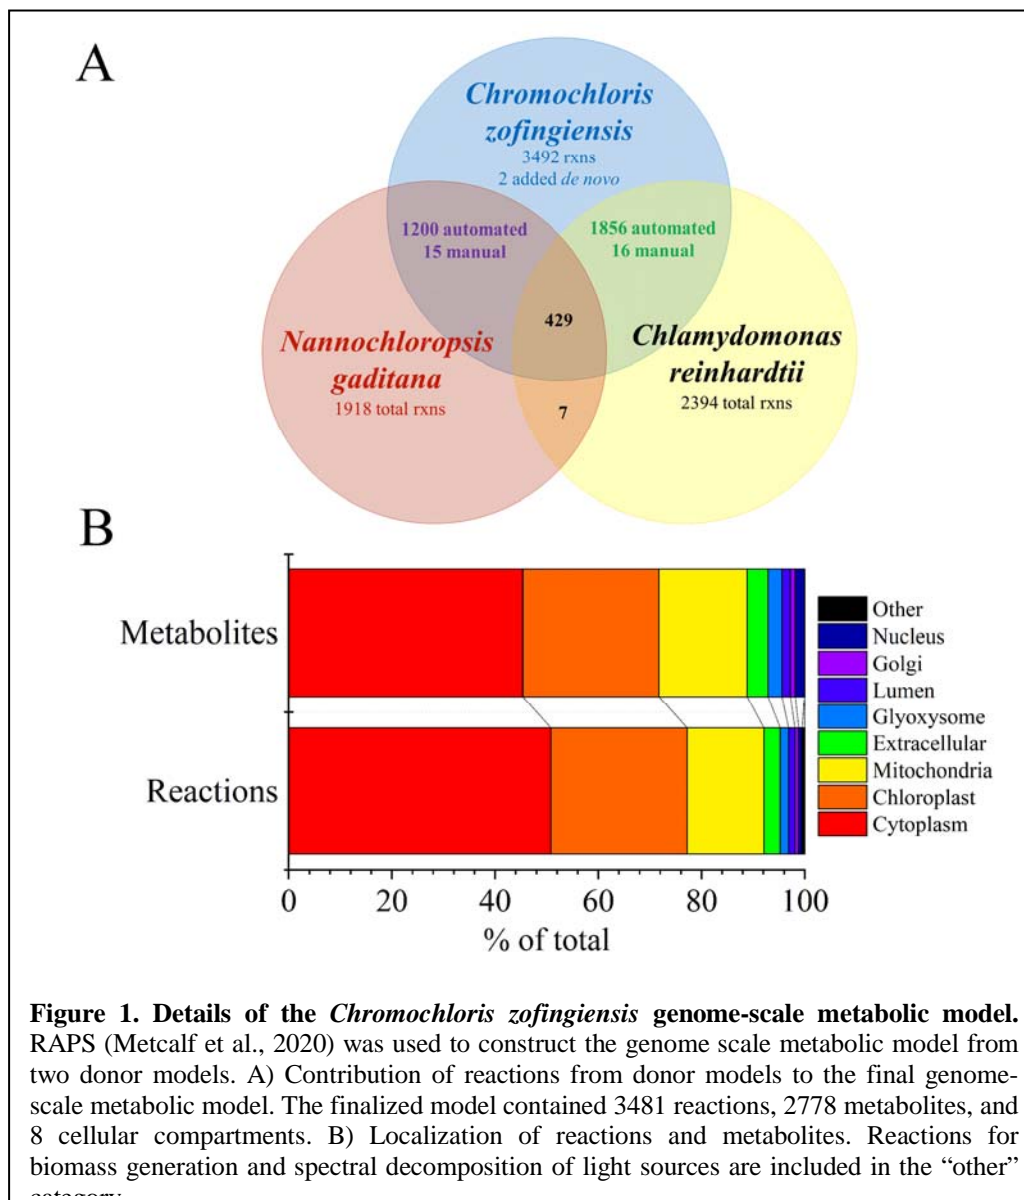

## Biomass Composition and the Biomass Objective Function

For each growth condition, we measured the biomass composition of cells in the exponential growth phase in continuous light (see Figure 2). This data, along with some key assumptions based on literature data on lipid and pigment compositions (Imam et al., 2015) were used to construct detailed biomass formation equations for each growth condition. It was assumed that the general profile of lipids and carotenoid pigments resembled that of *Chlamydomonas reinhardtii*, but with the inclusion of astaxanthin. A table of the full biomass formation equation for each growth condition is provided as Table S4 in the supplemental information.

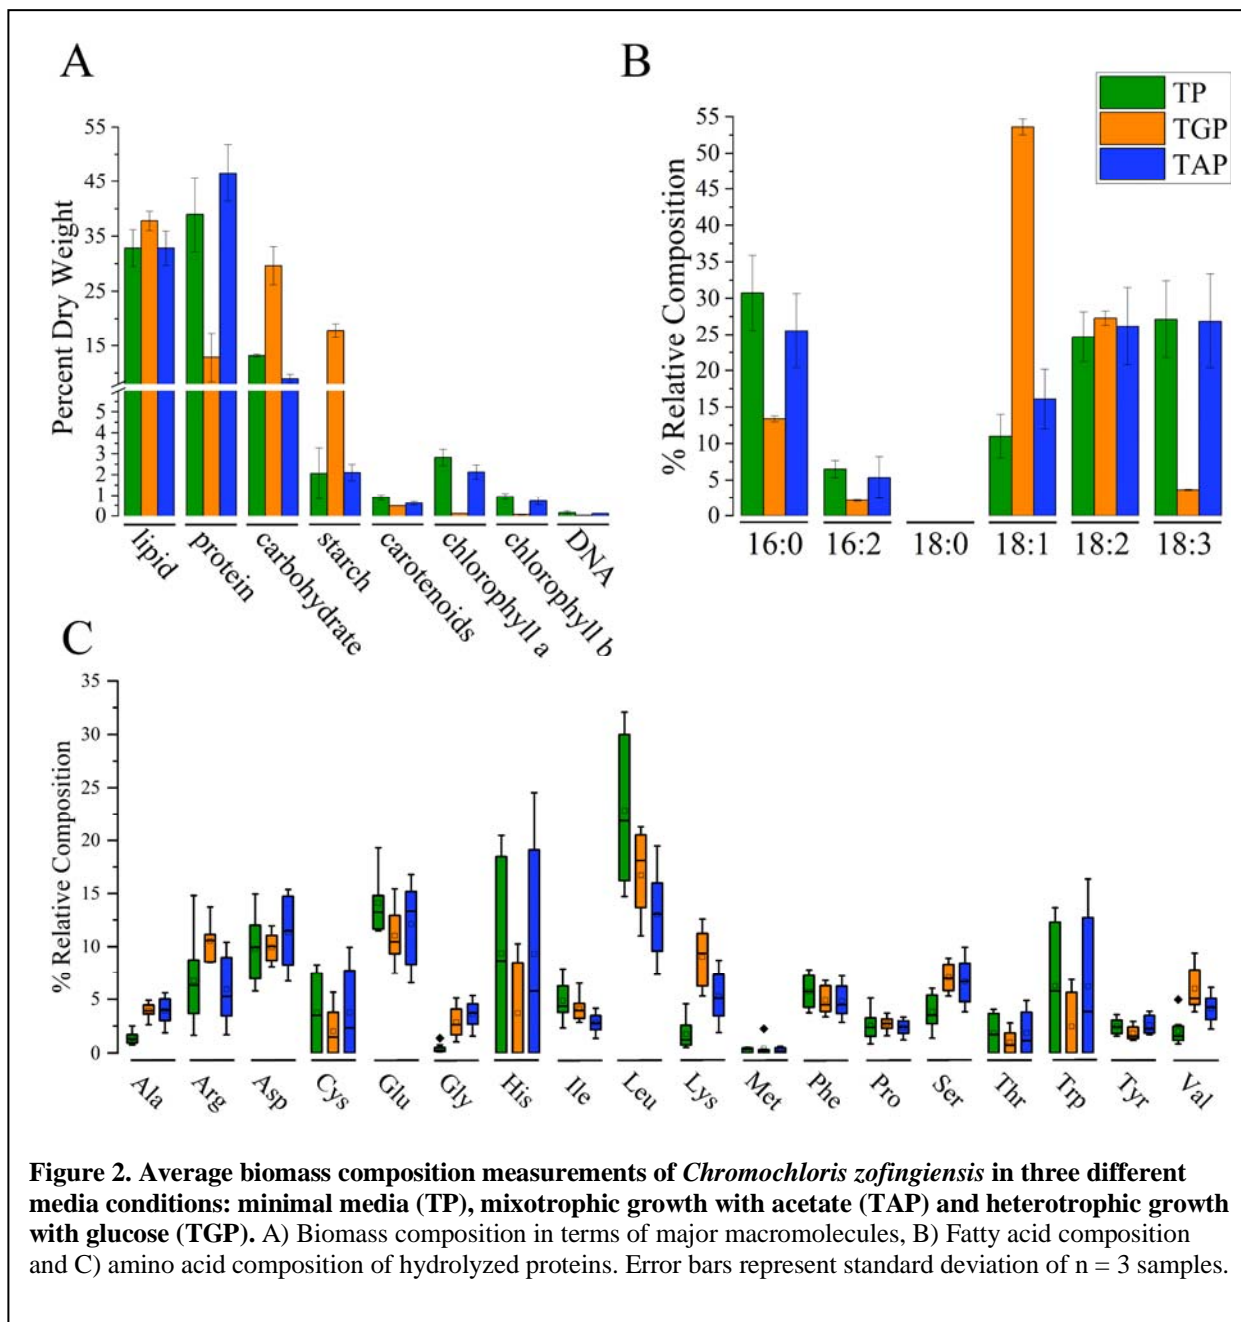

### Experimentally measured fluxes and rates used to constrain the model

To simulate *in vivo* growth conditions accurately, we measured reduced carbon uptake rates as well as the growth rate for each condition experimentally (Table 1) and used these as constraints

for the pFBA simulation. As expected, growth in the presence of a reduced carbon source increases the growth rate; the doubling time in the presence of glucose is approximately 17.7 hours compared to 22.3 hours in acetate and 31.5 hours for photoautotrophic growth.

**Table 1. Experimentally measured fluxes and rates used to constrain the metabolic model.**

| Model Constraints                | Media Formulation |                    |                    |
|----------------------------------|-------------------|--------------------|--------------------|
|                                  | TP                | TAP                | TGP                |
| Growth Rate ( $\text{h}^{-1}$ )  | $0.024 \pm 0.001$ | $0.031 \pm 0.0006$ | $0.039 \pm 0.0025$ |
| Acetate ( $\text{mmol/gDW-hr}$ ) |                   | $0.51 \pm 0.08$    |                    |
| Glucose ( $\text{mmol/gDW-hr}$ ) |                   |                    | $2.9 \pm 1.4$      |

### Flux Distributions and Predicted Exchanges

We simulated growth in three conditions: photoautotrophic (TP medium), mixotrophic with acetate (TAP medium) and heterotrophic with glucose (TGP medium). Although continuous light was used in all data collection experiments, it has been shown that *Chromochloris zofingiensis* degrades its photosynthetic apparatus in the presence of glucose, and this loss of photosynthetic activity is further evidenced by measured  $F_v/F_m$  values decreasing from 0.66 to 0.01 upon the addition of glucose (Roth et al., 2019). Therefore, regardless of light conditions, cultures provisioned with glucose will grow heterotrophically. Interestingly, this is reinforced by parsimonious flux balance analysis (pFBA) predictions; when growth in TGP medium is simulated, the pFBA solution predicts no absorption of light despite the model allowing it (**Error! Reference source not found.**). Simulations for growth on glucose also predict an array of fermentation products, including: acetate, lactate, succinate, ethanol, and formate while autotrophic and mixotrophic growth conditions are not predicted to have excretion products. The



flux map for autotrophic growth (Figure 3) shows that the majority of carbon flux is directed through the Calvin Benson Bassham (CBB) cycle in the chloroplast, as would be expected. There is also significant flux through malate valves to shuttle ATP and NAD(P)H into the different cellular compartments (Selinski and Scheibe, 2019). In mixotrophic growth (**Error! Reference source not found.**), far less flux is seen through the CBB cycle and instead triose phosphates are transported into the cytosol and are shuttled back and forth between the mitochondria to move energy and reducing equivalents around the cell. Acetate taken up by the cell is transported into the mitochondria and converted into acetyl-coA. In heterotrophic growth (Figure 5), the model correctly predicts no photosynthetic light harvesting (without constraints placed on the model to limit/eliminate it) (Roth et al., 2019). The intracellular flux of glucose in heterotrophic growth is shown in Figure 5 to be directed to the plastid despite there being a parallel pathway in the cytosol; we hypothesize this is due to the need for ATP and NADH in the plastid. The model also predicts that growth on glucose induces the excretion of several overflow metabolites, such as acetate, lactate, succinate and ethanol (Table 2). These flux maps indicate that there are significant differences between the growth conditions modeled and that these manifest as differences in biomass composition (Figure 2).

**Table 2. Predicted Uptake and Excretion Fluxes.** Negative values indicate uptake, while positive values indicate excretion.

| <b>Predicted Exchanges (mmol/gDW-hr)</b> | <b>TP</b> | <b>TAP</b> | <b>TGP</b> |
|------------------------------------------|-----------|------------|------------|
| Oxygen                                   | 1.14      | 0.611      | -0.063     |
| Carbon Dioxide                           | -0.973    | -0.356     | 2.49       |
| Water                                    | -0.656    | 0.105      | 0.364      |
| Acetate                                  | 0         | -0.505     | 0.781      |
| Lactate                                  | 0         | 0          | 0.271      |
| Succinate                                | 0         | 0          | 0.982      |
| Ethanol                                  | 0         | 0          | 2.22       |
| Formate                                  | 0         | 0          | 0.001      |
| Photons                                  | -44.0     | -44.0      | 0          |

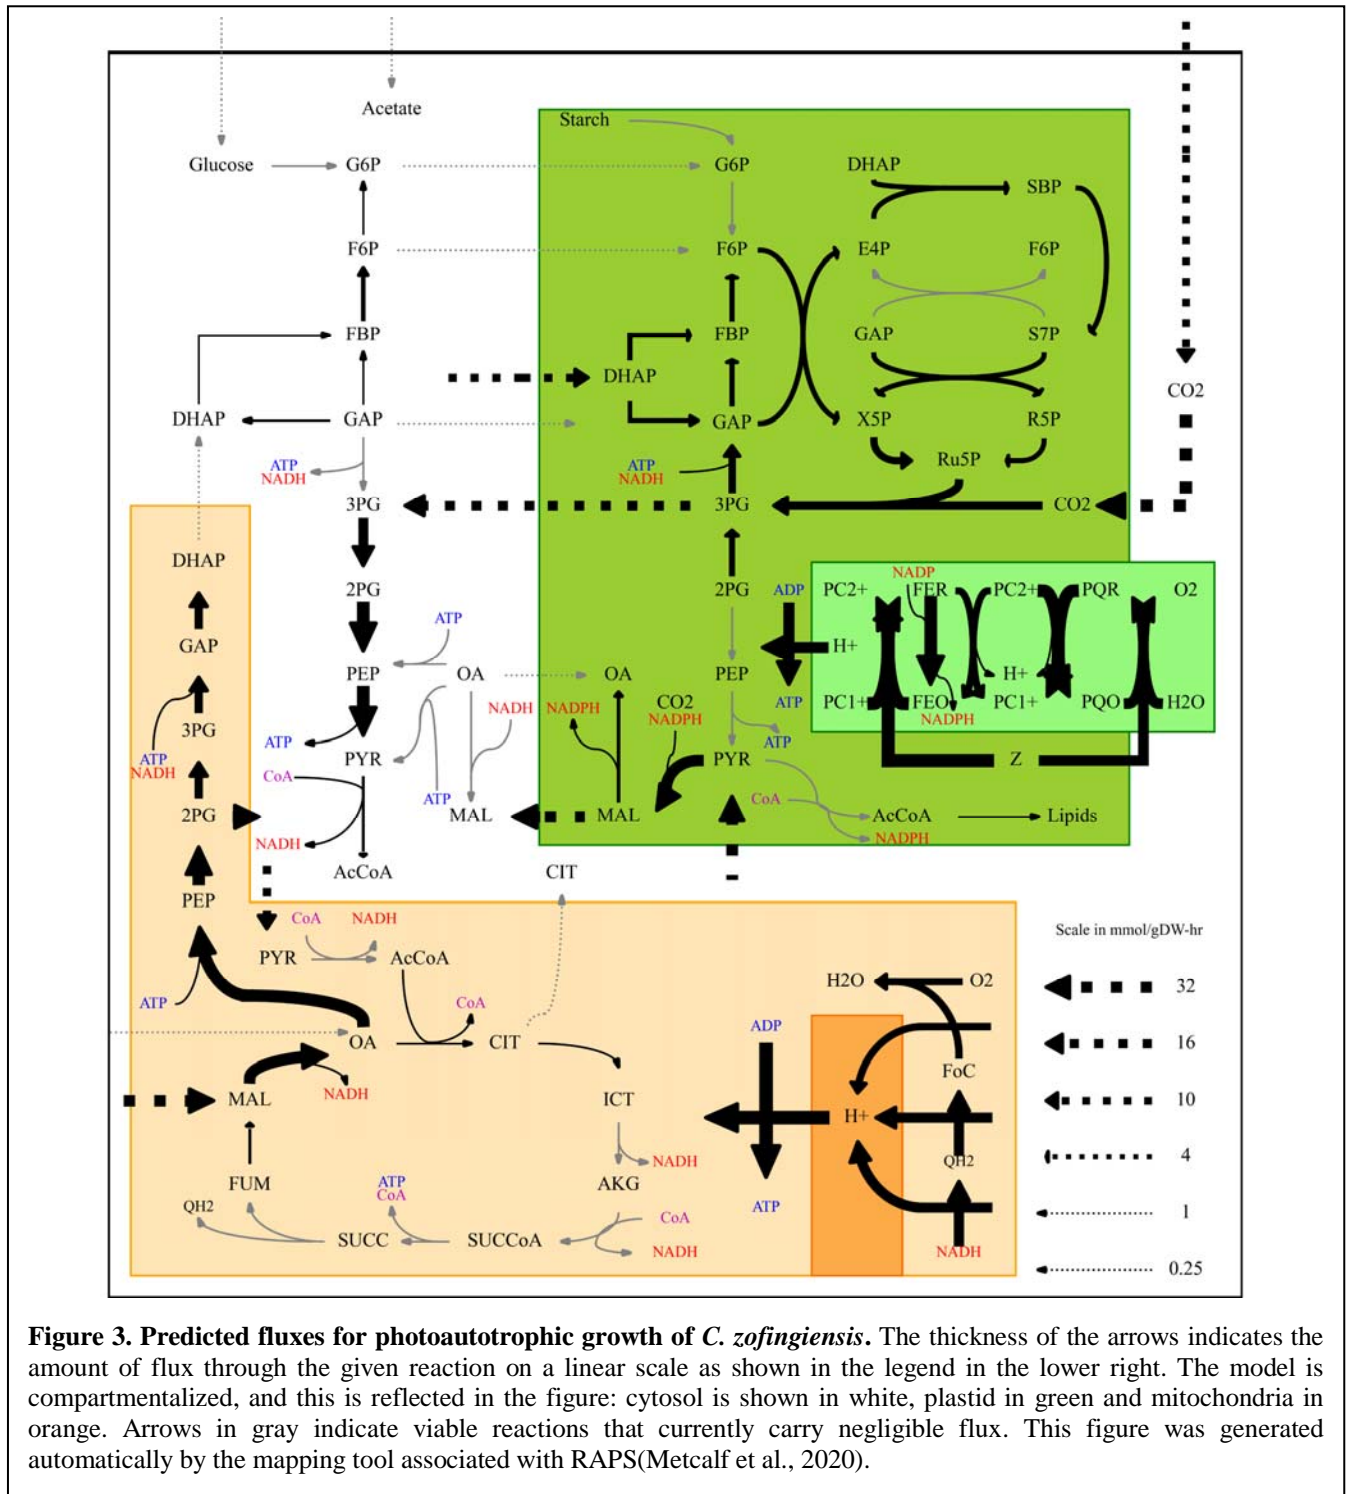

**Figure 3. Predicted fluxes for photoautotrophic growth of *C. zofingiensis*.** The thickness of the arrows indicates the amount of flux through the given reaction on a linear scale as shown in the legend in the lower right. The model is compartmentalized, and this is reflected in the figure: cytosol is shown in white, plastid in green and mitochondria in orange. Arrows in gray indicate viable reactions that currently carry negligible flux. This figure was generated automatically by the mapping tool associated with RAPS(Metcalf et al., 2020).

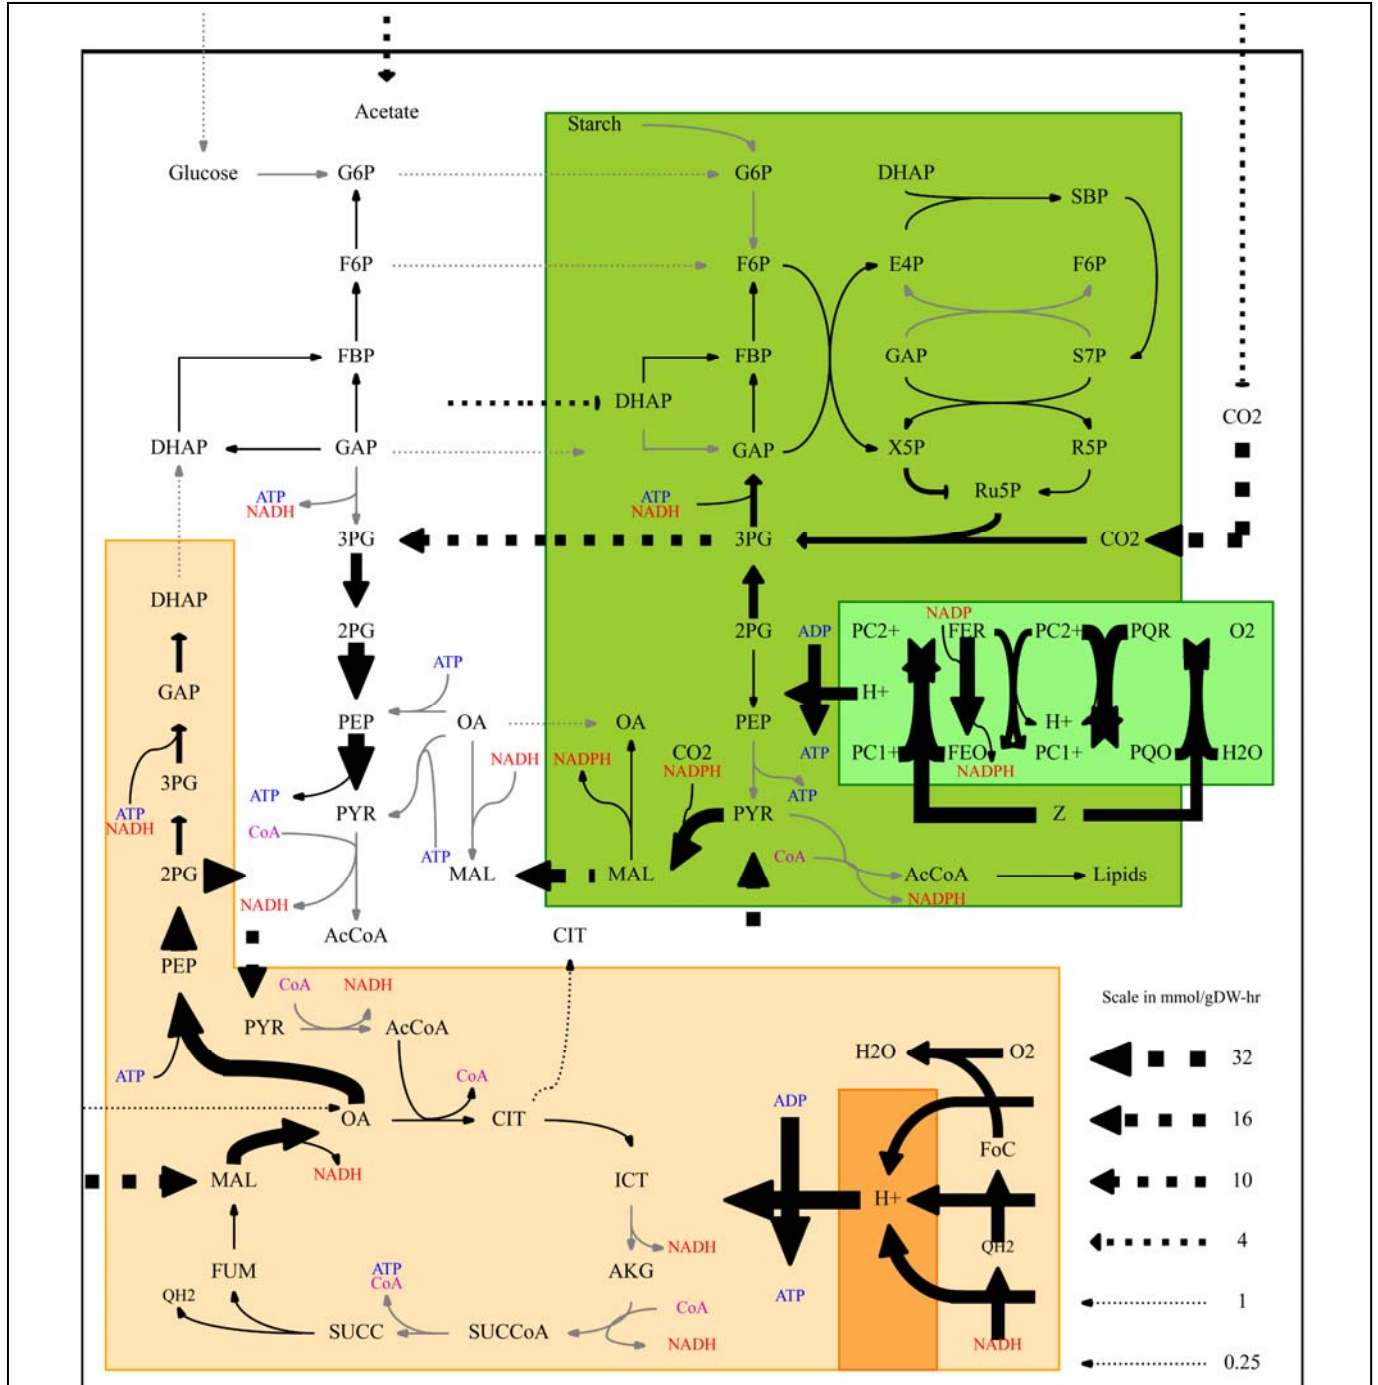

**Figure 4. Predicted fluxes for mixotrophic growth of *C. zofingiensis* on acetate.** The thickness of the arrows indicates the amount of flux through the given reaction on a linear scale as shown in the legend in the lower right. The model is compartmentalized, and this is reflected in the figure: cytosol is shown in white, plastid in green and mitochondria in orange. Arrows in gray indicate viable reactions that currently carry negligible flux. This figure was generated automatically by the mapping tool associated with RAPS(Metcalf et al., 2020).

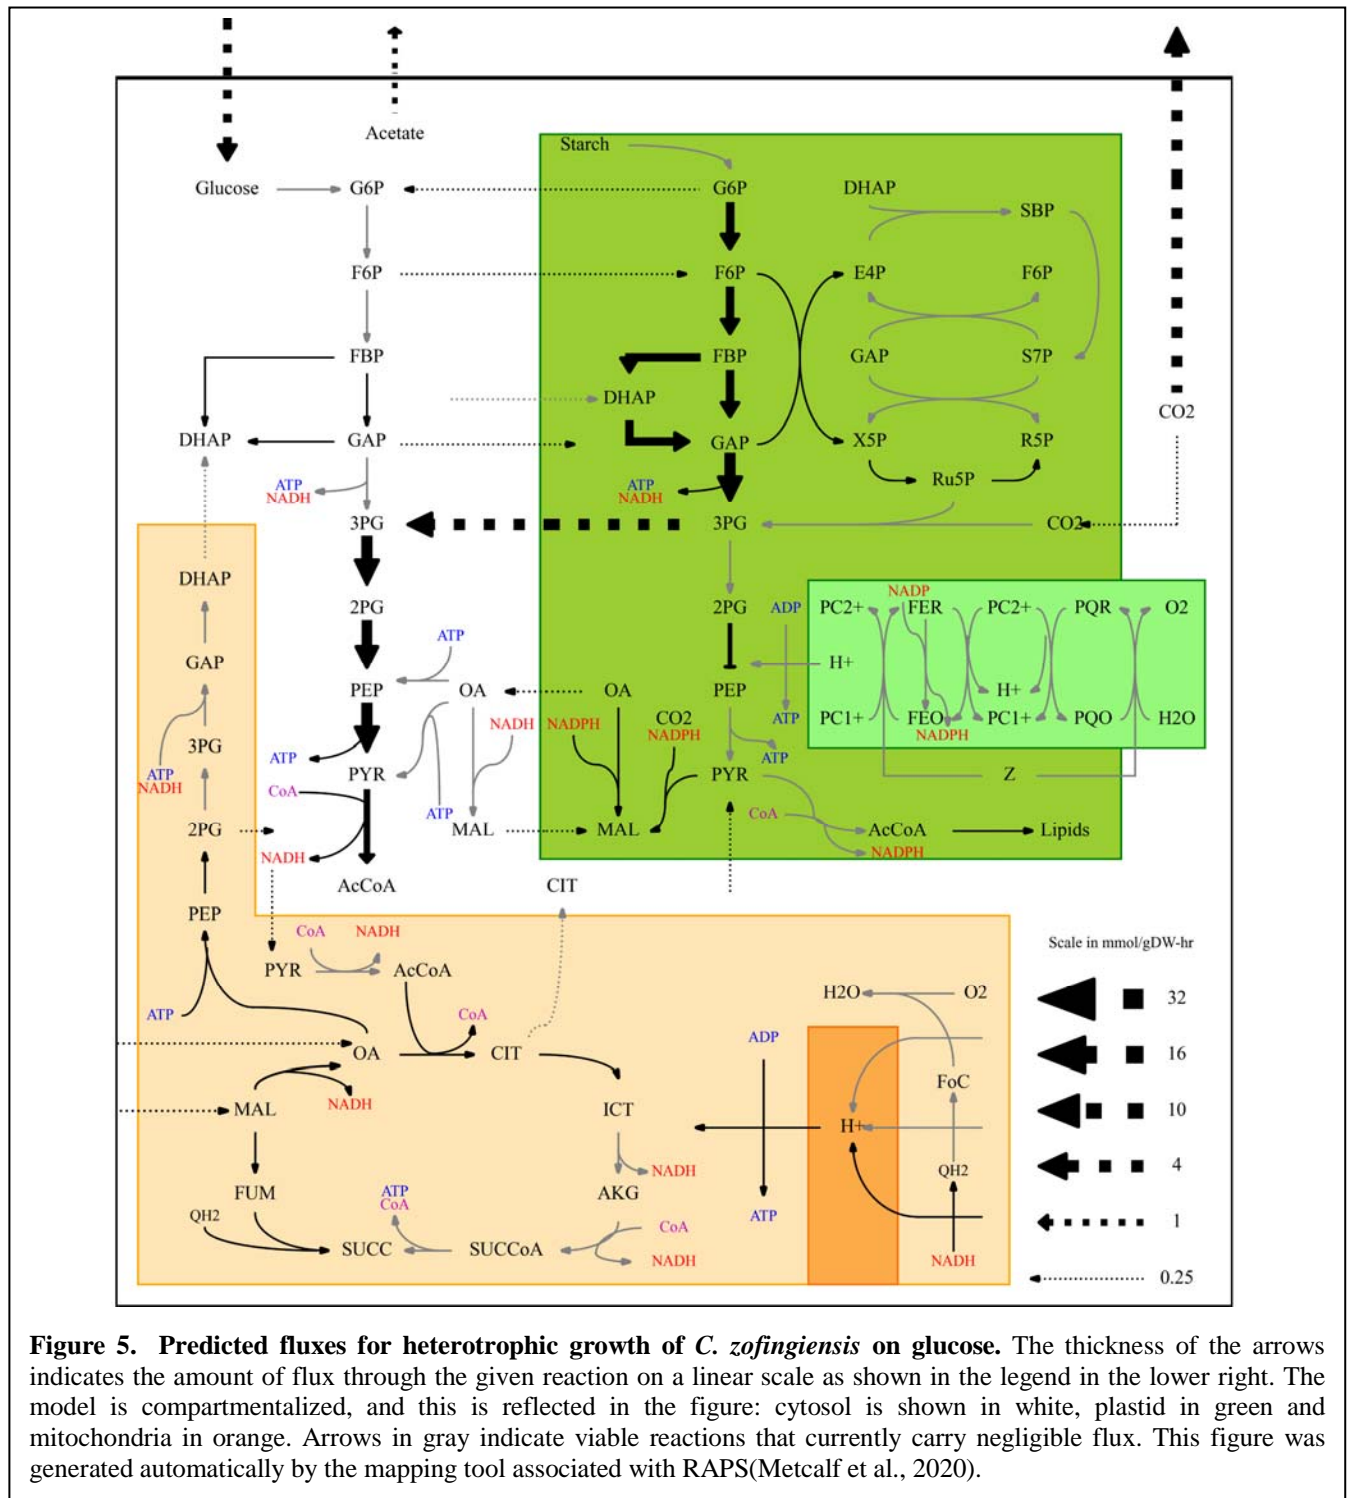

## Metabolomics Analysis

As the model simulation of growth on glucose predicted the production of fermentation products, we performed untargeted metabolomics of spent media from cultures grown in TAP and TGP, sampled in late exponential phase, to identify metabolites excreted during growth. Results of this analysis are presented in Figure 6 showing the peak areas for select metabolites that are found at much higher concentrations in TGP than in TAP media. The full dataset is provided as Supplemental File 4. The most abundant metabolite found in the media was lactate, followed by the amino acid leucine. We also performed an enzymatic lactic acid assay on spent media from TP and TGP cultures to quantify lactic acid excretion. Cultures grown in the presence of glucose were found to have an approximate lactate excretion rate of  $0.005 \pm 0.0004 \frac{\text{mmol}}{\text{g CDW} \cdot \text{h}}$ , while lactate production in autotrophic cultures was estimated to be  $0.0004 \pm 0.0001 \frac{\text{mmol}}{\text{g CDW} \cdot \text{h}}$ . The amount of lactate produced during heterotrophic growth is only a small fraction of the glucose uptake, 0.2%, so that indicates that there are other fermentation products produced.

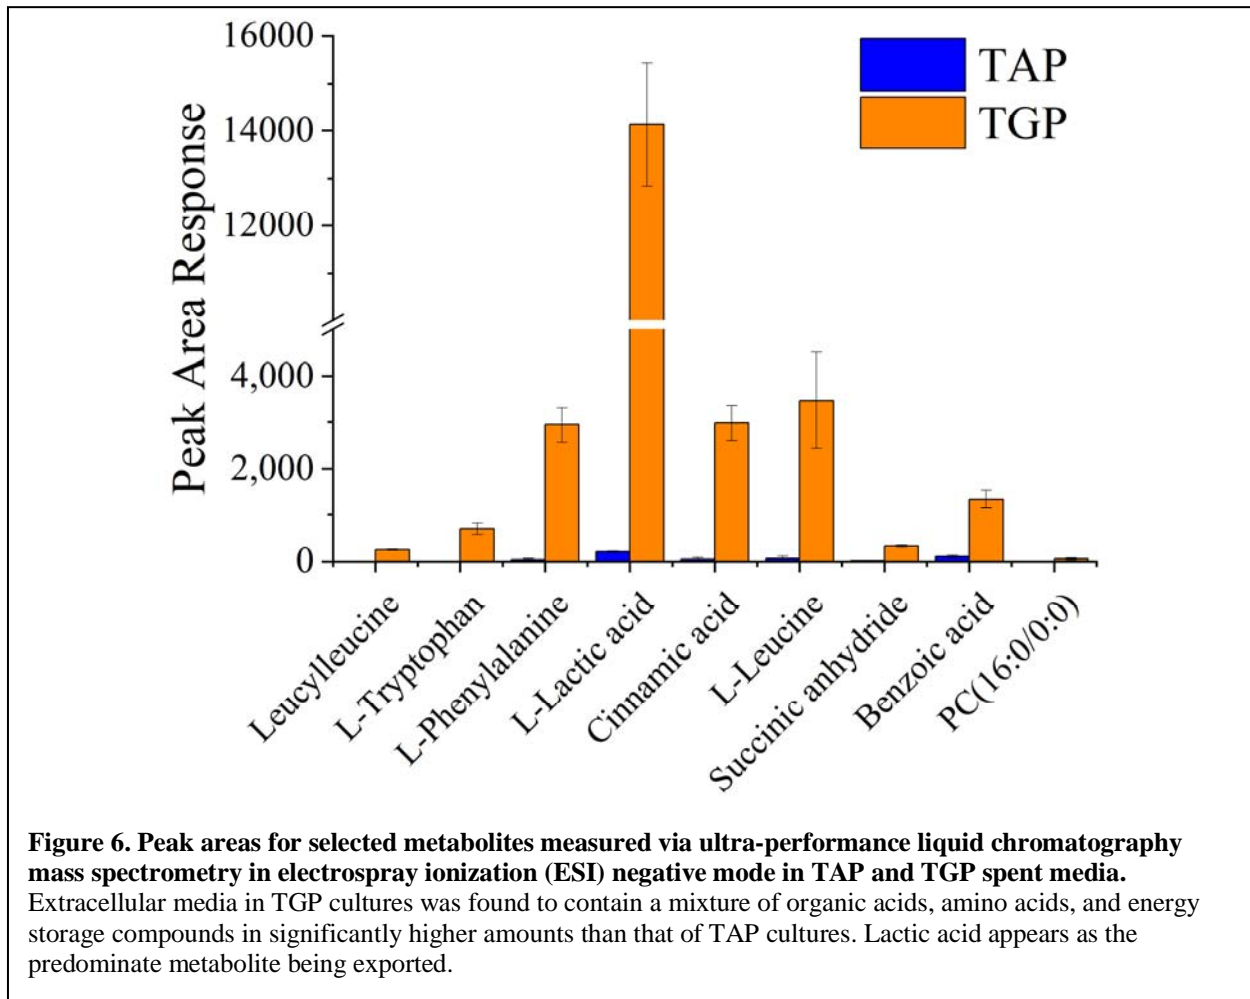

### Essential Gene Analysis

An *in silico* gene essentiality analysis was performed on the genome-scale metabolic model of *Chromochloris zofingiensis* for growth in continuous light. The results of this analysis indicated that out of the 1914 genes included in the model, only 82 were essential for growth in both the autotrophic and mixotrophic cases (essential genes reduce growth to 10% or less when knocked out) while 93 genes were essential for growth in the heterotrophic case. Table 3 shows the summarized results of this analysis; the full list of essential genes for each growth condition is provided as Table S5 in the supplemental file.

Unsurprisingly, both autotrophic and mixotrophic growth both require genes associated with the light harvesting apparatus, while heterotrophic growth requires the genes associated with mitochondrial electron transport chain. Other than the examples listed above, there were 81 genes essential for growth in all growth conditions. This list included transketolase genes associated with reactions in the pentose phosphate pathway and the gene for  $Mg^{2+}$  transporters. Other genes essential for all growth conditions were involved in the production of biomass. These genes can be grouped into amino acid and protein synthesis (35), nucleic acid synthesis (18), lipid synthesis (11), pigment synthesis (10), and energy molecule synthesis (5).

**Table 3. Results of the gene essentiality analysis for all three growth conditions.** Genes which, when deleted, result in a simulated growth rate of >80%, 80-10%, and <10% of the wild type are categorized as non-essential, beneficial, and essential, respectively.

|               | <b>Autotrophic</b> | <b>Mixotrophic</b> | <b>Heterotrophic</b> |
|---------------|--------------------|--------------------|----------------------|
| Essential     | 82                 | 82                 | 93                   |
| Beneficial    | 14                 | 16                 | 15                   |
| Non-essential | 1818               | 1818               | 1806                 |



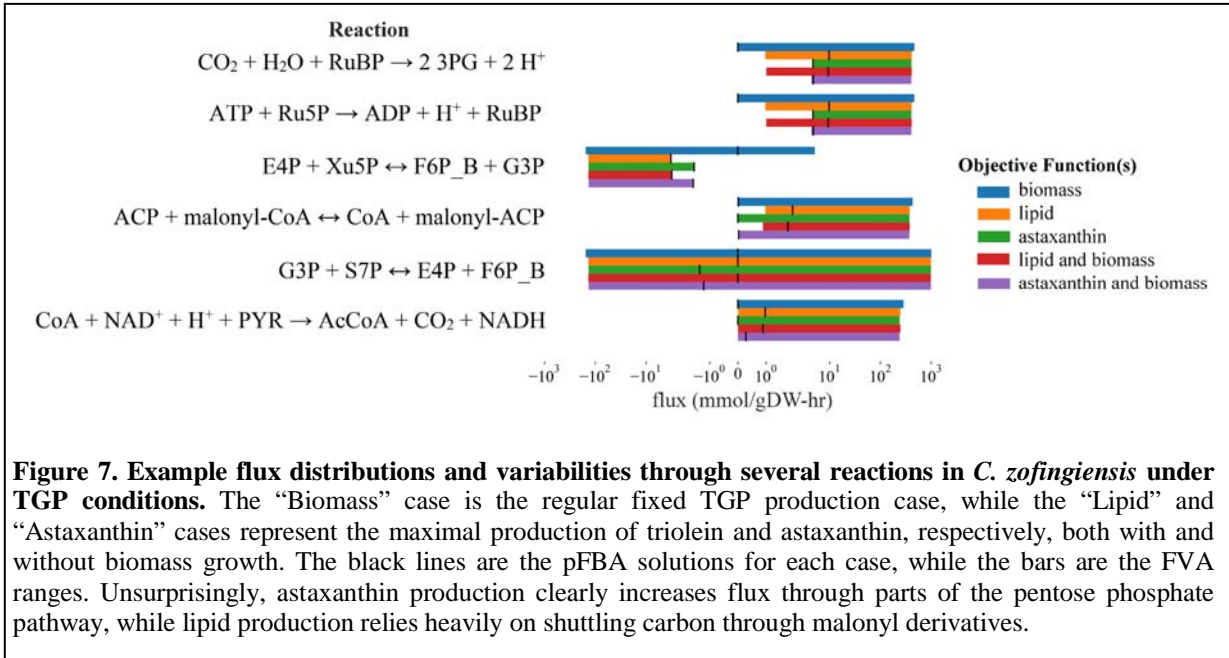

**Figure 7. Example flux distributions and variabilities through several reactions in *C. zofingiensis* under TGP conditions.** The “Biomass” case is the regular fixed TGP production case, while the “Lipid” and “Astaxanthin” cases represent the maximal production of triolein and astaxanthin, respectively, both with and without biomass growth. The black lines are the pFBA solutions for each case, while the bars are the FVA ranges. Unsurprisingly, astaxanthin production clearly increases flux through parts of the pentose phosphate pathway, while lipid production relies heavily on shuttling carbon through malonyl derivatives.

### Flux Variability Analysis

As heterotrophic growth triggers accumulation of lipids and astaxanthin, examining the metabolic constraints of that may yield insights into possible targets of genetic manipulations. We used the model to evaluate flux variability in different growth conditions that may lead to increases in production of lipids or astaxanthin: heterotrophically. We simulated five different cases – TGP, TGP with lipid export at both full biomass production and no biomass production, and TGP with astaxanthin export at both full biomass production and no biomass production (Figure 7). The uppermost bar is the normal TGP biomass production case, where the growth rate is fixed to experimental values and there is no additional production of any desired products. The next two bars show the values for maximal production of triolein (a lipid composed of only oleic acid tails, chosen because of the high fraction of oleic acid produced by TGP) and astaxanthin, respectively, without any required biomass production. The last two represent the maximal production of triolein and astaxanthin with the TGP fixed growth rate. The increase in

flux through lipid and carotenoid pathways is unsurprising, as these pathways represent the sole mechanisms for moving more carbon into the desired products. Moreover, the cell's use of fermentation is clearly visible in these FVA results, as there is a wide range of potential flux values for the nominal TGP biomass production case, indicating that the cell is not limited by energy. A full set of FVA data for all reactions is available in supplemental files 5-9.

## **Discussion**

### Creation of the Genome Scale Metabolic Model

The creation of a genome-scale model is often an iterative process; as more is learned about the organism of interest and genome annotation improves, the model improves as well. Typically, this means that each subsequent use of the model results in a more complete and/or more accurate model based on new discoveries. For the development of the *Chromochloris* model, we used RAPS RAPS , an automated algorithm specifically designed for the creation of algal GSMs, to create the first draft network in less than an hour. The first draft network was then subject to manual curation to remove duplicate or erroneous reactions, add missing reactions and fill gaps in pathways. The manual curation required is dependent on the quality of the donor models used in RAPS, and their similarity to the organism of interest. Presently, there are a limited number of genome scale metabolic models of algae to select from for use as RAPS donor models, so manual curation of the RAPS output was necessary. Manually added reactions included the two reactions required for astaxanthin synthesis from zeaxanthin (the production of adonixanthin from zeaxanthin and the production astaxanthin from adonixanthin), as those reactions are not included in the RAPS source models. Less than 2% of the reactions in the model required

manual annotation, greatly reducing the manual curation effort and time required to produce the final genome scale model.

### Biomass Composition

Autotrophic and mixotrophic cultures supplemented with acetate were observed to have similar growth rates and phenotypes. This is also confirmed with the similarity in biomass composition. The biomass composition of heterotrophic cultures were significantly different than both autotrophic and mixotrophic cultures in biomass composition, growth characteristics, and physical appearance. This suggests that significant metabolic shifts occur in *C. zofingiensis* when grown heterotrophically. In terms of macromolecular composition, growth on glucose leads to higher lipid and starch content, and lower protein content (see Figure 2A). This tendency for *C. zofingiensis* to accumulate carbon storage compounds when grown in the presence of glucose is well documented in the literature (Liu et al., 2010; Liu et al., 2011; Liu et al., 2012; Liu et al., 2013; Roth et al., 2019). Our average experimental value of lipid content in heterotrophic cultures of *C. zofingiensis*, expressed as percent dry weight, was  $37.8\% \pm 1.7$ . This lies in agreement with values reported in the literature ranging from 30 - 52% lipid content on a cell dry weight basis, depending on the concentration of sugar provided in the medium (Liu et al., 2010; Liu et al., 2011; Liu et al., 2012; Liu et al., 2013). Heterotrophic cultures grown on glucose were found to have lower protein content than cultures grown in other media conditions. It has been observed that *C. zofingiensis* cultures grown on glucose experience a loss of photosynthetic machinery (Roth et al., 2019). Additionally, the gene essentiality analysis conducted on *C. zofingiensis* presented in this work indicates that the gene encoding RubisCO is not essential for growth on glucose. In *Chlamydomonas reinhardtii*, the photosynthetic light harvesting apparatus and RubisCO combined account for 13.9% of total cellular protein content (Hammel et al.,

2018), so it is possible that the lower protein content observed in cultures grown on glucose is the result of the loss of photosynthetic proteins in these cultures. We also measured an increase in the oleic acid content of the lipid fraction (see Figure 2B), which agrees with previous studies (Liu et al., 2011; Liu et al., 2013). A study by Liu et al. reported that the introduction of glucose in *C. zofingiensis* cultures led to a dramatic increase in the expression of the genes encoding stearoyl-acyl carrier protein desaturase (SAD) and the BC subunit of acetyl-CoA carboxylase (ACCase) (Liu et al., 2012). ACCase catalyzes the first step in fatty acid synthesis, and SAD catalyzes the conversion of stearic acid to oleic acid, therefore, this change in gene expression is likely the reason for the high oleic acid content observed.

### Flux Maps

FBA simulations were performed to quantify changes in flux distributions resulting from growth on different media formulations. The flux distribution for *C. zofingiensis* grown mixotrophically on acetate closely resembles the flux distribution found for autotrophically grown cultures. Despite the availability of acetate as a reduced carbon source, the flux map of mixotrophic cultures is similar to photoautotrophic cultures. This could be due to the low acetate uptake rate of 0.505 mmol/gDW hr compared to the carbon dioxide uptake rate of 0.97 mmol/gDW hr. The acetate that is taken up by the cell is directed to both lipid synthesis and energy production via the TCA cycle. Both autotrophic and mixotrophic growth have high flux through photosynthetic light reactions, carbon fixation, and the pentose phosphate pathway (See **Error! Reference source not found.** A&B). In autotrophic conditions, the flux distribution is very similar to that calculated for *Chlamydomonas reinhardtii* (Boyle and Morgan, 2009). However, flux distributions calculated for mixotrophic growth on acetate differ from that in *C. reinhardtii*(Boyle and Morgan, 2009), with zero flux through the TCA cycle, and heavy carbon

fixation activity. *Chromochloris zofingiensis* is not capable of mixotrophic growth on glucose, due to the degradation of the photosynthetic apparatus upon the introduction of glucose to the cultures (Roth et al., 2019). The flux maps for heterotrophic growth show a high flux through glycolysis and have almost no flux through the pentose phosphate pathway; this agrees with another metabolic model of Eukaryotic algae, *Chlorella vulgaris*, which had no flux through the oxidative phase of the pentose phosphate pathway under heterotrophic conditions (Zuniga et al., 2016). Interestingly, simulations for cultures grown heterotrophically on glucose predicted the formation of organic acid fermentation products. A large portion of the glucose flux (61%) is excreted as fermentation products instead of being utilized by the TCA cycle. Flux balance analysis (Broddrick et al., 2016) and metabolic flux analysis (Yang et al., 2002) on heterotrophically grown algae support the notion that the full TCA cycle may not be used during heterotrophic growth. (Yang et al., 2002; Broddrick et al., 2016). The model is not limited in anyway by oxygen uptake, so this is not obligatorily anaerobic fermentation – given the large amount of protein required for the TCA cycle, it is likely that the cell ferments glucose as a way to reduce the amount of enzyme required for the cell to produce energy.

Excess production capabilities were evaluated using flux variability analysis in Table 4. There are several critical points raised by this table. First, the presence of fermentation products in the “Measured Growth” result, and the corresponding lack of such in the “Maximum Growth” case. While ethanol is not the only fermentation product produced in this case, it is included as an example to highlight this switch. The cell’s fermentation is also predicted by the extremely low oxygen uptake in the “Measured Growth” model and the corresponding switch to high oxygen consumption in the “Maximum Growth” model. Fixed growth produces fermentation because the relatively low energy needs of the cell can be adequately met by the simple fermentative

pathways, and the pFBA formulation of the model optimization will always produce the simplest (lowest total flux) solution.

**Table 4. Comparison of measured and maximum growth exchanges**

| Simulation                                                                  | Growth Rate | Glucose Exchange | CO <sub>2</sub> Exchange | O <sub>2</sub> Exchange | Ethanol Exchange |
|-----------------------------------------------------------------------------|-------------|------------------|--------------------------|-------------------------|------------------|
|                                                                             | (1/hr)      | (mmol/gDW-hr)    |                          |                         |                  |
| experimentally determined growth rate and glucose uptake                    | 0.039       | -2.91            | 2.49                     | -0.06                   | 2.22             |
| simulated maximum growth rate with experimentally determined glucose uptake | 0.230       | -2.91            | 6.16                     | -4.05                   | 0                |

This large energy excess appears to come from the cell’s preference for fermentation. Table 4 compares the growth of the cell in two cases. Both are simulated in TGP, and therefore have identical rates of glucose uptake, but the “Maximum Growth” case does not have growth fixed to a specific value. Instead, it is unbounded and optimized for. This case represents the cell’s production potential when glucose can be utilized as efficiently as possible. The striking changes in the oxygen, carbon dioxide, and ethanol exchanges reinforce that the cell resides in a majority-fermentation mode under high glucose conditions. This large energy excess appears to come from the cell’s preference for fermentation. Table 4 compares the growth of the cell in two cases: both are simulated in TGP, and therefore have identical rates of glucose uptake, but the simulated maximum growth case allows the model to freely adjust growth rate. This case represents the cell’s biomass production potential when glucose can be utilized as efficiently as possible. The striking changes in the oxygen and carbon dioxide exchanges reinforce that the cell resides in a majority-fermentation mode under high glucose conditions – the fermentation products listed in Table 2 all vanish under maximal growth, as the cell can efficiently extract more energy by oxidizing the carbon into carbon dioxide, via the TCA cycle. These results

present two conclusions: First, glucose transporters are not limiting the growth rate of the cell, as otherwise the rate of glucose consumption would be low enough to require non-fermentative energy generation. Second, something is limiting the cell's ability to respire and efficiently utilize glucose. It may be valuable to conduct studies on oxygen levels in the culture, to determine if there is sufficient oxygen available to respire, as well as experiments in cultures with low glucose, to determine the cell's transition point between fermentation and respiration.

### Network Evaluation and Robustness

An *in silico* gene essentiality analysis was performed to assess metabolic network robustness in *C. zofingiensis*. This was done by performing a series of continuous light single gene knockouts, simulating cell growth under these gene deletions, and finally comparing predicted growth rates to that of the wild type cells. Gene deletions which resulted in growth rates of >80%, 10-80%, and <10% of the wild type simulations enabled the genes to be classified as non-essential, beneficial, and essential. The genes encoding Ribulose- 1,5-bisphosphate carboxylase-oxygenase (RuBisCO) was categorized as essential for growth in autotrophic and mixotrophic cases, but not for the heterotrophic case. In the case of a RuBisCO knockout in mixotrophic growth, the maximum growth rate that can be achieved is only 41% of the wild type growth rate, even though acetate uptake made up roughly two-thirds of the total wild-type carbon uptake. 12 genes were found to be essential in heterotrophic growth, but not in the autotrophic or mixotrophic cases, and all of these related to the ATP synthase complex V in the mitochondria. The high number of non-essential genes in each growth condition (see Table 3) points towards a highly robust metabolic network. This analysis was modeled after an *in silico* gene essentiality analysis performed by Broddrick et.al. (Broddrick et al., 2016). In this study, the initial computational evaluation for the number of essential genes in *Synechococcus elongatus* was 134, which was

later increased based on *in vivo* data collected (Broddrick et al., 2016). It is likely that computational evaluations underestimate the number of essential genes for growth for several reasons (Broddrick et al., 2016), nonetheless, by comparing this data set to *in vivo* data on gene essentiality important knowledge gaps in the *C. zofingiensis* metabolic network may be identified.

### Metabolomics analysis

The excretion of lactate to the medium was predicted by the model and validated by our metabolomics analysis. This has not been reported in the literature previously but is not completely unheard of. Algae in the *Chlamydomonas*, *Chlorogonium*, and *Chlorella* genera have been shown to be capable of fermentation (Catalanotti et al., 2013), but this behavior is most often observed in anoxic conditions. In yeast, with high enough glucose concentrations, cells have been reported to preferentially ferment glucose even in the presence of oxygen (Van Dijken and Scheffers, 1986; Pronk et al., 1996). It has been postulated that this fermentation activity primarily occurs to re-generate  $\text{NAD}^+/\text{NADP}^+$  used in glycolysis and balance the redox state of the cell (Catalanotti et al., 2013). To investigate the production of fermentation products, we performed an untargeted metabolomics experiment, analyzing spent media from heterotrophic cultures (TGP media) and mixotrophic cultures (TAP media). Lactate was identified in the extracellular media in significant quantities, seemingly verifying the model prediction of excreted fermentation products. The presence of lactate was also observed in a separate analysis using a lactic acid assay, with lactate concentrations reaching a maximum of 0.3 mM. Amino acids were also found to be present in the extracellular media, in far higher concentrations in heterotrophic cultures than mixotrophic cultures. It is also possible that observed extracellular metabolites are the result of cell lysis induced in lipid accumulating



cultures. However, two metabolites that would be expected to increase in concentration from cell lysis, deoxyribose sugars and oleic acid, were found in lower levels in spent TGP media than TAP media. The high abundance of metabolites displayed, and lack of other intracellular metabolites is indicative that there is export of these compounds happening.

## **Conclusion**

This work presents iChr1925, the first genome scale metabolic model for the emerging model species *C. zofingiensis* and demonstrates its usefulness in making predictions of phenotype under different growth conditions. This organism is of high promise for biofuel production when grown heterotrophically, with both high lipid productivities and a fatty acid profile acceptable for fuel production (Liu et al., 2011). We also present a detailed analysis of the biomass composition in *C. zofingiensis* in three different growth conditions, and an assessment of the metabolic network flexibility. Analysis and testing of the model indicated that *C. zofingiensis* preferentially ferments in the presence of glucose – and experimental evidence later confirmed this prediction. This successful validation means the model is useful for predicting cellular phenotypes under varying nutrient conditions. This model will be extremely useful in further understanding the metabolic implications of *C. zofingiensis*'s propensity to accumulate astaxanthin, and generating strategies to improve strain production.

## **Materials and Methods**

### **Culture Growth Conditions**

*Chromochloris zofingiensis* cultures provided by Professor Niyogi's lab at UC Berkeley were grown in 500 mL baffled flasks in culture volumes of 200 mL. Cultures were maintained under

constant light, with an average intensity of  $90 \mu\text{mol}/\text{m}^2\cdot\text{s}$ , a temperature of  $25^\circ\text{C}$ , and an agitation speed of 180 rpm. *C. zofingiensis* cultures were grown in three different media conditions, Tris-Phosphate (TP) minimal medium (adapted from (Gorman and Levine, 1965)), TP supplemented with 25 g/L glucose (TGP), and TAP medium (Gorman and Levine, 1965), each at a pH of 7. Specific growth rates for each set of culture conditions were measured in triplicate.

### Model Construction and Curation

An automated tool, Rapid Annotation of Photosynthetic Systems (RAPS) (Metcalf et al., 2020), was used to build the initial draft metabolic network reconstruction. This tool compares the cell's predicted proteins to known proteins in other previously published models. The donor models used were eukaryotic microalgae whose genomes had been previously annotated, as detailed by Metcalf (Metcalf et al., 2020).

The major steps in model curation were the manual adjustments to the RAPS reactions, and the addition of the astaxanthin production reactions. There were several manual adjustments, as shown in Table S1 and Table S2. These modifications were generally performed to remove thermodynamically infeasible loops or redundant luminal or intermitochondrial space reactions. Once RAPS had produced the draft model, the reactions for astaxanthin production were added.

### Biomass Composition Measurements

Culture samples were collected during mid exponential growth phase (See supplementary information, figure S1) for dry weight determination and biomass composition analysis. Cell dry weight was determined by vacuum filtration of 15 mL culture samples through a pre-dried, 1.6

$\mu\text{m}$  pore size glass microfiber filter. After filtration, cells were rinsed with TP medium and dried in an 80°C oven overnight. For biomass composition analysis, culture volumes corresponding to approximately 5 mg cell dry weight were aliquoted and spun down to collect a cell pellet. Cell pellets were then ground with 5 mm diameter stainless steel balls in a Retsch cryomill to disrupt the tough cell wall observed in *C. zofingiensis*.

For analysis of protein content, the pellet from chlorophyll extraction was solubilized by suspending in 0.2 N NaOH and heating to boiling for 1 hr. A 1:5 dilution of this protein solution was quantified using a Pierce BCA protein assay kit (Thermo scientific). For analysis of the relative composition of amino acids, proteins were hydrolyzed, and the resulting mixture of amino acids was converted to their tert-butyldimethylsilyl derivatives as described in work by Antoniewicz et. al. (Antoniewicz et al., 2007). The time allowed for the derivatization reaction was extended as described by Mawhinney et.al. (Mawhinney et al., 1986) to overcome steric hindrance involved in the addition of the tert-butyldimethylsilyl group on histidine, tryptophan, and threonine. After derivatization, the mixture was run on the GC/MS with a quadrupole FID detector. Due to the significant decrease in response for histidine after 6 h noted by Mawhinney et.al. (Mawhinney et al., 1986), it was ensured that all samples were run within 6 h of the completion of the derivatization reaction. A combination of amino acid standard solution (AAS18) from Sigma, and a prepared solution of 5  $\mu\text{M}$  Tryptophan and Cysteine in 0.1 M HCl were used to generate standard curves for quantification. GC/MS conditions were as described by Antoniewicz et. al. (Antoniewicz et al., 2007).

Lipid content was determined by gravimetric analysis, using a chloroform: methanol extraction of ground cells as described in Breuer et. al. (Breuer et al., 2013). Fatty Acid composition was determined by converting fatty acids present in lysed cell material to their methyl ester

derivatives (FAMES) and analyzing the FAMES on GC/MS. The procedure used for this analysis was outlined by Christie et.al. (Christie, 1998). The proportions of lipid existing as triacylglycerides, phospholipids, and sulfolipids was assumed to be relatively consistent with those values measured in *Chlamydomonas reinhardtii*.

For starch and total carbohydrate analysis, pigments were extracted from a ground cell pellet with a 95% ethanol solution, which was then washed and re-suspended in 100 mM sodium acetate (pH 4.5). Samples were autoclaved to transform particulate starch to colloidal starches. For starch content determination, 100  $\mu$ L of an 80 unit/mL solution of amyloglucosidase (Sigma Aldrich, S9144) was added to each autoclaved sample. Samples were then incubated at 55°C overnight to digest the starch into glucose, which was then quantified using a glucose assay (Sigma Aldrich, G3293). For determination of total carbohydrates, samples were heated to 100°C in 75% H<sub>2</sub>SO<sub>4</sub> containing 2 mg/mL Anthrone reagent for 15 minutes. A set of prepared starch standards was treated in the same manner in parallel to the samples. After cooling to room temperature, sample absorbance at 578 nm was used to construct a standard curve and calculate the concentration of the samples.

For analysis of nucleic acid content, DNA was extracted from ground cells using a DNeasy Plant mini kit (Qiagen) and quantified using a Nanodrop UV spec. RNA content was assumed to be 28-fold higher than DNA content (Valle et al., 1981). This ratio was measured in *Chlamydomonas reinhardtii*, but due to the phylogenetic similarity of the two species, and the lack of any such information for *Chromochloris*, this estimate is assumed to be sufficient.

To determine chlorophyll and total carotenoid content, ground cells were extracted with acetone twice. The pellet was saved for protein analysis, and acetone supernatant from each extraction

was pooled and measured in a spectrophotometer to determine the concentrations of chlorophylls a and b, and the concentration of total carotenoids as described by Lichtenthaler and Buschmann (Lichtenthaler and Buschmann, 2001).

### Determination of Model Constraints

Samples of TAP and TGP cultures were taken at various time points during growth for biomass and glucose/acetate measurements. Samples taken for glucose/acetate measurement were centrifuged at 5,000×g for three minutes, and the resulting supernatant was collected and filtered with a 0.2 µm pore size filter. This filtered supernatant was analyzed using a glucose assay kit (Sigma GAHK20) or acetate assay kit (Sigma MAK086). Average cell dry weight, and the change in extracellular glucose or acetate concentrations during exponential phase were used to calculate uptake rates to constrain the model.

### Metabolomics Analysis of Spent Media

Model predictions were validated with an untargeted metabolomics analysis of extracellular culture media. Samples of TGP and TAP cultures were collected in triplicate in late-exponential phase and centrifuged at 5,000×g for three minutes. The resulting supernatant was collected and filtered with a 0.2 µm pore size filter. Media samples were frozen and shipped over dry ice for analysis. Upon arrival, samples were thawed and lyophilized, then re-suspended in 500 µL of 80% methanol. Samples were then vortexed, followed by sonication for 30 min at 4 °C. Samples were incubated at -40 °C for 1 h, then vortexed and centrifuged again before 200 µL of the supernatant was collected. This sample was mixed with 5 µL of DL-o-Chlorophenylalanine (140 µg/mL) and transferred to vial for LC-MS analysis.

Sample separation was performed by a Waters 2695 LC combined with Q Exactive MS (Thermo). The LC system was comprised of ACQUITY UPLC HSS T3 (100×2.1mm×1.8 µm) with Waters 2695 LC. The mobile phase is composed of solvent A (0.05% formic acid-water) and solvent B (acetonitrile) with a gradient elution (0-1.5 min, 95-70% A; 1.5-9.5 min, 70-5% A; 9.5-13.5 min, 5% A; 13.5-13.6 min, 5-95% A; 13.6-16.0 min, 95% A). The flow rate of the mobile phase is 0.3 mL·min<sup>-1</sup>. The column temperature was maintained at 40°C, and the sample manager temperature was set at 4°C. Mass spectrometry parameters in ESI+ and ESI- mode are listed as follows: ESI+: Heater Temp 300 °C; Sheath Gas Flow rate, 45arb; Aux Gas Flow Rate, 15arb; Sweep Gas Flow Rate, 1arb; spray voltage, 3.0KV; Capillary Temp, 350 °C; S-Lens RF Level, 30%. ESI-: Heater Temp 300 °C, Sheath Gas Flow rate, 45arb; Aux Gas Flow Rate, 15arb; Sweep Gas Flow Rate, 1arb; spray voltage, 3.2KV; Capillary Temp, 350 °C; S-Lens RF Level, 60%. Sample peaks were identified by comparing MS spectra against the Yeast Metabolome Database (YMDB) and the Human Metabolome Database (HMDB).

A lactate assay was also performed on samples of spent media. Samples of TGP and TP cultures were collected in triplicate in late-exponential phase for both OD measurements and lactate analysis. Samples for lactate analysis were centrifuged at 5,000×g for three minutes. The resulting supernatant was collected and filtered with a 0.2 µm pore size filter, and analyzed using a L-Lactate assay kit from Megazyme. Data on biomass and lactate production during growth was used to calculate the reported excretion rates.

### Model Robustness Analysis

An *in silico* gene essentiality analysis was performed on the genome scale metabolic model of *Chromochloris zofingiensis*. This consisted of assessing the cells growth rate for single gene

deletions of every gene in the model, and assigning each gene as essential (achieve 0-50% of WT growth rate), beneficial (achieve 50- 99% of WT growth rate), or non-essential (achieve 99-100% of WT growth rate).

A Flux variability analysis was also performed on the model. Flux variability analysis (FVA)(Mahadevan R, 2003) is a computational technique to fully explore the solution space of a model, given a specific set of constraints. FVA produces a maximum and minimum flux for every reaction within the model, given a requirement to optimize the objective function to a certain fraction of the optimal solution. It is a key part of OptForce (Ranganathan et al., 2010), an algorithm that evaluates which reactions must be upregulated or downregulated in order to produce a certain amount of a desired product.

## REFERENCES

- Antoniewicz MR, Kelleher JK, Stephanopoulos G** (2007) Accurate assessment of amino acid mass isotopomer distributions for metabolic flux analysis. *Anal Chem* **79**: 7554-7559
- Boyle NR, Morgan JA** (2009) Flux balance analysis of primary metabolism in *Chlamydomonas reinhardtii*. *BMC Syst Biol* **3**: 4
- Breuer G, Evers WA, de Vree JH, Kleinegris DM, Martens DE, Wijffels RH, Lamers PP** (2013) Analysis of fatty acid content and composition in microalgae. *J Vis Exp*
- Breuer G, Lamers PP, Martens DE, Draaisma RB, Wijffels RH** (2012) The impact of nitrogen starvation on the dynamics of triacylglycerol accumulation in nine microalgae strains. *Bioresour Technol* **124**: 217-226
- Breuer G, Lamers PP, Martens DE, Draaisma RB, Wijffels RH** (2012) The impact of nitrogen starvation on the dynamics of triacylglycerol accumulation in nine microalgae strains. *Bioresour Technol* **124**: 217-226
- Broddrick JT, Rubin BE, Welkie DG, Du N, Mih N, Diamond S, Lee JJ, Golden SS, Palsson BO** (2016) Unique attributes of cyanobacterial metabolism revealed by improved genome-scale metabolic modeling and essential gene analysis. *Proc Natl Acad Sci U S A* **113**: E8344-E8353
- Catalanotti C, Yang W, Posewitz MC, Grossman AR** (2013) Fermentation metabolism and its evolution in algae. *Front Plant Sci* **4**: 150
- Chen J, Henson MA** (2016) In silico metabolic engineering of *Clostridium ljungdahlii* for synthesis gas fermentation. *Metab Eng* **38**: 389-400
- Chen JH, Liu L, Wei D** (2017) Enhanced production of astaxanthin by *Chromochloris zofingiensis* in a microplate-based culture system under high light irradiation. *Bioresour Technol* **245**: 518-529
- Christie WW** (1998) Gas Chromatography-Mass Spectrometry Methods for Structural Analysis of Fatty Acids. *Lipids* **33**: 343-353
- Chua PS, Salleh AHM, Mohamad MS, Deris S, Omatu S, Yoshioka M** (2015) Identifying a gene knockout strategy using a hybrid of the bat algorithm and flux balance analysis to enhance the production of succinate and lactate in *Escherichia coli*. *Biotechnology and Bioprocess Engineering* **20**: 349-357
- Emenike VN, Schenkendorf R, Krewer U** (2018) Model-based optimization of biopharmaceutical manufacturing in *Pichia pastoris* based on dynamic flux balance analysis. *Computers & Chemical Engineering* **118**: 1-13
- Gorman DS, Levine RP** (1965) Cytochrome f and plastocyanin: their sequence in the photosynthetic electron transport chain of *Chlamydomonas reinhardtii*. *Proc. Natl. Acad. Sci.* **54**: 1665-1669
- Hammel A, Zimmer D, Sommer F, Muhlhaus T, Schroda M** (2018) Absolute Quantification of Major Photosynthetic Protein Complexes in *Chlamydomonas reinhardtii* Using Quantification Concatamers (QconCATs). *Front Plant Sci* **9**: 1265
- Hirokawa Y, Matsuo S, Hamada H, Matsuda F, Hanai T** (2017) Metabolic engineering of *Synechococcus elongatus* PCC 7942 for improvement of 1,3-propanediol and glycerol production based on in silico simulation of metabolic flux distribution. *Microb Cell Fact* **16**: 212



- Imam S, Schauble S, Valenzuela J, Lopez Garcia de Lomana A, Carter W, Price ND, Baliga NS** (2015) A refined genome-scale reconstruction of *Chlamydomonas* metabolism provides a platform for systems-level analyses. *Plant J* **84**: 1239-1256
- Ip P-F, Wong K-H, Chen F** (2004) Enhanced production of astaxanthin by the green microalga *Chlorella zofingiensis* in mixotrophic culture. *Process Biochemistry* **39**: 1761-1766
- Li Y HJ, Sandmann G, Chen F.** (2009) High-light and sodium chloride stress differentially regulate the biosynthesis of astaxanthin in *Chlorella zofingiensis* (Chlorophyceae). *J Phycol.* **45**: 635-641
- Lichtenthaler HK, Buschmann C** (2001) Chlorophylls and Carotenoids: Measurement and Characterization by UV-VIS Spectroscopy. **1**: F4.3.1-F4.3.8
- Liu J, Huang J, Fan KW, Jiang Y, Zhong Y, Sun Z, Chen F** (2010) Production potential of *Chlorella zofingiensis* as a feedstock for biodiesel. *Bioresour Technol* **101**: 8658-8663
- Liu J, Huang J, Jiang Y, Chen F** (2012) Molasses-based growth and production of oil and astaxanthin by *Chlorella zofingiensis*. *Bioresour Technol* **107**: 393-398
- Liu J, Huang J, Sun Z, Zhong Y, Jiang Y, Chen F** (2011) Differential lipid and fatty acid profiles of photoautotrophic and heterotrophic *Chlorella zofingiensis*: Assessment of algal oils for biodiesel production. *Bioresour Technol* **102**: 106-110
- Liu J, Mao X, Zhou W, Guarneri MT** (2016) Simultaneous production of triacylglycerol and high-value carotenoids by the astaxanthin-producing oleaginous green microalga *Chlorella zofingiensis*. *Bioresour Technol* **214**: 319-327
- Liu J, Sun Z, Gerken H, Liu Z, Jiang Y, Chen F** (2014) *Chlorella zofingiensis* as an alternative microalgal producer of astaxanthin: biology and industrial potential. *Mar Drugs* **12**: 3487-3515
- Liu J, Sun Z, Zhong Y, Gerken H, Huang J, Chen F** (2013) Utilization of cane molasses towards cost-saving astaxanthin production by a *Chlorella zofingiensis* mutant. *Journal of Applied Phycology* **25**: 1447-1456
- Liu J, Sun Z, Zhong Y, Huang J, Hu Q, Chen F** (2012) Stearoyl-acyl carrier protein desaturase gene from the oleaginous microalga *Chlorella zofingiensis*: cloning, characterization and transcriptional analysis. *Planta* **236**: 1665-1676
- Mahadevan R SC** (2003) The effects of alternate optimal solutions in constraint-based genome-scale metabolic models. *Metab Eng* **5**: 264-276
- Mawhinney TP, Robinett RRS, Atalay A, Madson MA** (1986) Analysis of Amino Acids as their *tert*-Butyldimethylsilyl Derivatives by Gas-Liquid Chromatography and Mass Spectrometry. *Journal of Chromatography* **358**: 231-242
- Metcalf AJ, Nagygyor A, Boyle NR** (2020) Rapid Annotation of Photosynthetic Systems (RAPS): automated algorithm to generate genome-scale metabolic networks from algal genomes. *Algal Research* **50**: 101967
- Metcalf AJ, Nagygyor A, Boyle NR** (2020) Rapid Annotation of Photosynthetic Systems (RAPS): automated algorithm to generate genome-scale metabolic networks from algal genomes. *Algal Research* **50**
- Mulders KJM, Weesepeel Y, Bodenes P, Lamers PP, Vincken J-P, Martens DE, Gruppen H, Wijffels RH** (2014) Nitrogen-depleted *Chlorella zofingiensis* produces astaxanthin, ketolutein and their fatty acid esters: a carotenoid metabolism study. *Journal of Applied Phycology* **27**: 125-140
- Orosa M, Torres E, Fidalgo P, Abalde J** (2000) Production and analysis of secondary carotenoids in green algae. *Journal of Applied Phycology* **12**: 553-556

- Orosa M, Valero JF, Herrero C, Abalde J** (2001) Comparison of the accumulation of astaxanthin in *Haematococcus pluvialis* and other green microalgae under N-starvation and high light conditions. *Biotechnology Letters* **23**: 1079-1085
- Overbeek R, Disz T, Stevens R** (2004) The SEED: A peer-to-peer environment for genome annotation. *Commun ACM* **47**
- Overbeek R, Olson R, Pusch GD, Olsen GJ, Davis JJ, Disz T, Edwards RA, Gerdes S, Parrello B, Shukla M** (2014) The SEED and the rapid annotation of microbial genomes using subsystems technology (RAST). *Nucleic Acids Res* **42**
- Paniagua-Michel J** (2015) Microalgal Nutraceuticals. *In Handbook of Marine Microalgae*, pp 255-267
- Pronk JT, Steensma HY, Van Dijken JP** (1996) Pyruvate Metabolism in *Saccharomyces cerevisiae*. *Yeast* **12**: 1607-1633
- Puchalka J, Oberhardt MA, Godinho M, Bielecka A, Regenhardt D, Timmis KN, Papin JA, Martins dos Santos VAP** (2008) Genome-Scale Reconstruction and Analysis of the *Pseudomonas putida* KT2440 Metabolic Network Facilitates Applications in Biotechnology. *PLoS Comput Biol* **4**
- Ranganathan S, Suthers PF, Maranas CD** (2010) OptForce: an optimization procedure for identifying all genetic manipulations leading to targeted overproductions. *PLoS Comput Biol* **6**: e1000744
- Rodriguez-Prados JC, de Atauri P, Maury J, Ortega F, Portais JC, Chassagnole C, Acerenza L, Lindley ND, Cascante M** (2009) In silico strategy to rationally engineer metabolite production: A case study for threonine in *Escherichia coli*. *Biotechnol Bioeng* **103**: 609-620
- Roth MS, Cokus SJ, Gallaher SD, Walter A, Lopez D, Erickson E, Endelman B, Westcott D, Larabell CA, Merchant SS, Pellegrini M, Niyogi KK** (2017) Chromosome-level genome assembly and transcriptome of the green alga *Chromochloris zofingiensis* illuminates astaxanthin production. *Proc Natl Acad Sci U S A* **114**: E4296-E4305
- Roth MS, Gallaher SD, Westcott DJ, Iwai M, Louie KB, Mueller M, Walter A, Foflonker F, Bowen BP, Ataii NN, Song J, Chen JH, Blaby-Haas CE, Larabell C, Auer M, Northen TR, Merchant SS, Niyogi KK** (2019) Regulation of Oxygenic Photosynthesis during Trophic Transitions in the Green Alga *Chromochloris zofingiensis*. *Plant Cell* **31**: 579-601
- Selinski J, Scheibe R** (2019) Malate valves: old shuttles with new perspectives. *Plant Biol (Stuttg)* **21 Suppl 1**: 21-30
- Shah AR, Ahmad A, Srivastava S, Jaffar Ali BM** (2017) Reconstruction and analysis of a genome-scale metabolic model of *Nannochloropsis gaditana*. *Algal Research* **26**: 354-364
- Sun H, Ren Y, Lao Y, Li X, Chen F** (2020) A novel fed-batch strategy enhances lipid and astaxanthin productivity without compromising biomass of *Chromochloris zofingiensis*. *Bioresource Technology* **308**
- Sun N, Wang Y, Li Y-T, Huang J-C, Chen F** (2008) Sugar-based growth, astaxanthin accumulation and carotenogenic transcription of heterotrophic *Chlorella zofingiensis* (Chlorophyta). *Process Biochemistry* **43**: 1288-1292
- Thompson RA, Dahal S, Garcia S, Nookaew I, Trinh CT** (2016) Exploring complex cellular phenotypes and model-guided strain design with a novel genome-scale metabolic model of *Clostridium thermocellum* DSM 1313 implementing an adjustable cellulosome. *Biotechnol Biofuels* **9**: 194

- Valle O, Lein T, Knutsen G** (1981) Fluorometric Determination of DNA and RNA in Chlamydomonas using Ethidium Bromide. *Journal of Biochemical and Biophysical Methods* **4**: 271-277
- Van Dijken JP, Scheffers WA** (1986) Redox balances in the metabolism of sugars by yeasts. *FEMS Microbiology Reviews* **32**: 199-224
- Wang C, Liu J, Liu H, Wang J, Wen J** (2017) A genome-scale dynamic flux balance analysis model of *Streptomyces tsukubaensis* NRRL18488 to predict the targets for increasing FK506 production. *Biochemical Engineering Journal* **123**: 45-56
- Yang C, Hua Q, Shimizu K** (2002) Metabolic flux analysis in *Synechocystis* using isotope distribution from <sup>13</sup>C-labeled glucose. *Metab Eng* **4**: 202-216
- Zuniga C, Li CT, Huelsman T, Levering J, Zielinski DC, McConnell BO, Long CP, Knoshaug EP, Guarnieri MT, Antoniewicz MR, Betenbaugh MJ, Zengler K** (2016) Genome-Scale Metabolic Model for the Green Alga *Chlorella vulgaris* UTEX 395 Accurately Predicts Phenotypes under Autotrophic, Heterotrophic, and Mixotrophic Growth Conditions. *Plant Physiol* **172**: 589-602
